# Supplementary material for: Sequencing of intraductal biopsies is feasible and potentially impacts clinical management of patients with indeterminate biliary stricture and cholangiocarcinoma
Source: Springer Nature journal article supplement (doi:10.1038/s41424-018-0015-6), 2018-04-01
Supplement: MOESM1 [file 41424_2018_15_MOESM1_ESM.xlsx]

## Sheet: SupplTable1
Supplementary Table 1: Estimated prevalence of mutated genes
Gene	Mutation rate (Cosmic database 05/2016)	Estimated prevalence of mutated genes in 16 tumors per gene	Full gene in Panel (1=yes, 2=no)
ARID1A	0.113208	1.81132	1		Cumulated estimated prevalence of mutated genes in 16 tumors
ARID2	0.0460526	0.736842	1		34.2386
AXIN1	0.0662252	1.0596	1		Estimated prevalence of mutated genes per tumor in 16 tumors
BAP1	0.0849057	1.35849	1		2.13991
BRAF	0.0466377	0.746204	1
BRCA1	0.0277778	0.444444	1
CDH1	0.0316742	0.506787	1
CDKN2A	0.149351	2.38961	1
CTNNB1	0.0287162	0.459459	1
ELF3	0.0314961	0.503937	1
EPHA2	0.0393701	0.629921	1
ERBB2	0	0	1
ERBB3	0.0657895	1.05263	1
FAM47A	0.0393701	0.629921	1
FBXW7	0.0497738	0.79638	1
FGFR2	0.032	0.512	1
FGFR3	0	0	1
GNAS	0.0620155	0.992248	1
IDH1	0.0974771	1.55963	1
IDH2	0.0355505	0.568807	1
KRAS	0.223684	3.57895	1
MDM2	0	0	1
MET	0.0115	0.184	1
MUC4	0.032	0.512	1
NRAS	0.03	0.48	1
PBRM1	0.08	1.28	1
PIK3CA	0.0665529	1.06485	1
PTEN	0.0381679	0.610687	1
RNF43	0.0454545	0.727273	1
ROBO2	0.0384615	0.615385	1
SMAD4	0.0932203	1.49153	1
SMARCA4	0.0388889	0.622222	1
STK11	0	0	1
TERT	0.0379404	0.607046	1
TP53	0.356651	5.70642	1
APC	0.0327869		2
ATM	0.0526316		2
FAT1	0.0333333		2
MUC16	0.0314961		2
NF1	0.032		2
ADAMTSL3	0.0393701		2

## Sheet: SupplTable2
Pool	Target Region	Chromosome	Start Coordinate	Stop Coordinate	Target Type	Target Count	Amplicons
A	ADAMTSL3	15	84322838	84708593	Cds	27	60
A	ADAMTSL3 + ADAMTSL3	15	84611343	84611839	FullRegion	1	4
A	ARID1A	1	27022522	27108601	Cds	12	50
A	ARID1A + ARID1A	1	27092707	27093062	FullRegion	1	3
A	ARID1A + ARID1A	1	27098986	27099483	FullRegion	1	4
A	ARID1A + ARID1A	1	27100815	27101716	FullRegion	1	10
A	ARID1A + ARID1A + ARID1A	1	27099832	27100394	FullRegion	1	5
A	ARID2	12	46123620	46301819	Cds	11	52
A	ARID2 + ARID2	12	46123615	46123925	FullRegion	1	3
A	ARID2 + ARID2	12	46230367	46230779	FullRegion	1	4
A	ARID2 + ARID2	12	46231099	46231495	FullRegion	1	4
A	ARID2 + ARID2	12	46285558	46285884	FullRegion	1	3
A	ARID2 + ARID2	12	46287198	46287509	FullRegion	1	4
A	AXIN1	16	337440	402676	Cds	10	29
A	BAP1	3	52435025	52444009	Cds	7	12
A	BAP1 + BAP1	3	52437149	52437915	FullRegion	1	9
A	BAP1 + BAP1	3	52441185	52441481	FullRegion	1	3
A	BAP1 + BAP1 + BAP1	3	52436302	52436892	FullRegion	1	5
A	BAP1 + BAP1 + BAP1	3	52443565	52443899	FullRegion	1	3
A	BRAF	7	140433813	140624564	Cds	18	33
A	BRCA1	17	41196312	41277500	Cds	19	25
A	BRCA1 + BRCA1	17	41197693	41197824	FullRegion	1	1
A	BRCA1 + BRCA1	17	41228500	41228636	FullRegion	1	2
A	BRCA1 + BRCA1	17	41243447	41246882	FullRegion	1	36
A	BRCA1 + BRCA1	17	41258468	41258555	FullRegion	1	1
A	CDH1	16	68771195	68869444	Cds	14	29
A	CDH1 + CDH1	16	68842322	68842756	FullRegion	1	4
A	CDKN2A	9	21967751	21994490	Cds	3	4
A	CDKN2A + CDKN2A	9	21970896	21971212	FullRegion	1	3
A	CDKN2A + CDKN2A	9	21974474	21974831	FullRegion	1	4
A	CTNNB1	3	41240942	41281939	Cds	7	12
A	CTNNB1 + CTNNB1	3	41274827	41275363	FullRegion	1	5
A	CTNNB1 + CTNNB1	3	41277835	41278205	FullRegion	1	4
A	CTNNB1 + CTNNB1 + CTNNB1	3	41266440	41267357	FullRegion	1	10
A	ELF3	1	201979690	201986315	Cds	3	5
A	ELF3 + ELF3	1	201981080	201981569	FullRegion	1	5
A	ELF3 + ELF3 + ELF3	1	201981763	201982431	FullRegion	1	8
A	EPHA2	1	16450832	16482582	Cds	10	21
A	EPHA2 + EPHA2	1	16459670	16460106	FullRegion	1	4
A	EPHA2 + EPHA2	1	16464343	16464930	FullRegion	1	7
A	EPHA2 + EPHA2 + EPHA2	1	16458211	16458939	FullRegion	1	8
A	ERBB2	17	37844393	37884915	Cds	11	17
A	ERBB2 + ERBB2	17	37863238	37863399	FullRegion	1	2
A	ERBB2 + ERBB2	17	37866334	37866739	FullRegion	1	4
A	ERBB2 + ERBB2	17	37871534	37871794	FullRegion	1	3
A	ERBB2 + ERBB2	17	37872549	37872863	FullRegion	1	3
A	ERBB2 + ERBB2	17	37879567	37879918	FullRegion	1	3
A	ERBB2 + ERBB2	17	37882810	37883261	FullRegion	1	4
A	ERBB2 + ERBB2	17	37883543	37884299	FullRegion	1	8
A	ERBB2 + ERBB2 + ERBB2	17	37880974	37881660	FullRegion	1	8
A	ERBB3	12	56473809	56497291	Cds	10	17
A	ERBB3 + ERBB3	12	56478774	56479098	FullRegion	1	3
A	ERBB3 + ERBB3	12	56482322	56482657	FullRegion	1	3
A	ERBB3 + ERBB3	12	56486526	56486865	FullRegion	1	3
A	ERBB3 + ERBB3	12	56492279	56492694	FullRegion	1	4
A	ERBB3 + ERBB3	12	56494840	56495841	FullRegion	1	11
A	ERBB3 + ERBB3 + ERBB3	12	56481356	56481951	FullRegion	1	5
A	ERBB3 + ERBB3 + ERBB3	12	56490282	56491019	FullRegion	1	8
A	ERBB3 + ERBB3 + ERBB3	12	56493427	56494034	FullRegion	1	5
A	FAM47A	X	34147869	34150447	Cds	1	17
A	FBXW7	4	153242410	153456393	Cds	12	28
A	FBXW7 + FBXW7	4	153332423	153332960	FullRegion	1	5
A	FGFR2	10	123237844	123357972	Cds	17	29
A	FGFR2 + FGFR2	10	123239093	123239540	FullRegion	1	4
A	FGFR2 + FGFR2	10	123274626	123274838	FullRegion	1	2
A	FGFR3	4	1795039	1810599	Cds	7	14
A	FGFR3 + FGFR3 + FGFR3	4	1803089	1803757	FullRegion	1	6
A	FGFR3 + FGFR3 + FGFR3	4	1808268	1808991	FullRegion	1	8
A	FGFR3 + FGFR3 + FGFR3 + FGFR3 + FGFR3	4	1807077	1808059	FullRegion	1	9
A	GNAS	20	57414795	57486250	Cds	7	12
A	GNAS + GNAS	20	57428316	57430393	FullRegion	1	19
A	GNAS + GNAS + GNAS	20	57478578	57478851	FullRegion	1	3
A	GNAS + GNAS + GNAS + GNAS + GNAS	20	57484212	57485141	FullRegion	1	10
A	IDH1	2	209100953	209119806	Cds	8	16
A	IDH2	15	90627212	90645708	Cds	4	6
A	IDH2 + IDH2	15	90630339	90630812	FullRegion	1	4
A	IDH2 + IDH2	15	90631586	90631984	FullRegion	1	4
A	IDH2 + IDH2 + IDH2	15	90628043	90628624	FullRegion	1	5
A	Important Region	17	29592260	29653216	Cds	5	34
A	Important Region	11	108205819	108235844	Cds	8	11
A	Important Region	4	187557976	187584615	Cds	1	1
A	Important Region	17	29560223	29586070	Cds	5	7
A	Important Region	11	108181002	108202674	Cds	12	21
A	Important Region	4	187549873	187557284	Cds	1	2
A	Important Region	4	187534351	187538164	Cds	1	2
A	Important Region	4	187527254	187531017	Cds	1	2
A	Important Region	4	187525045	187527253	Cds	1	2
A	Important Region	4	187521128	187522578	Cds	1	2
A	Important Region	5	112174169	112175302	Cds	1	12
A	Important Region	4	187524058	187524171	Cds	1	2
A	Important Region	5	112179678	112179724	FullRegion	1	1
A	Important Region	17	29654533	29654576	FullRegion	1	1
A	Important Region	11	108119673	108119710	FullRegion	1	2
A	Important Region	11	108178606	108178643	FullRegion	1	1
A	Important Region	19	8973410	8973445	FullRegion	1	1
A	Important Region	19	8958758	8958793	FullRegion	1	0
A	Important Region	19	8955016	8955051	FullRegion	1	1
A	Important Region	19	8955751	8955786	FullRegion	1	1
A	Important Region	19	8971875	8971910	FullRegion	1	1
A	Important Region	19	8953476	8953511	FullRegion	1	1
A	Important Region	19	8974589	8974624	FullRegion	1	1
A	Important Region	19	8969805	8969840	FullRegion	1	0
A	Important Region	19	8955343	8955378	FullRegion	1	1
A	Important Region	19	8980820	8980855	FullRegion	1	1
A	Important Region	19	8960033	8960068	FullRegion	1	1
A	Important Region	19	8966514	8966549	FullRegion	1	1
A	Important Region	19	8980245	8980280	FullRegion	1	0
A	Important Region	19	8966162	8966197	FullRegion	1	0
A	Important Region + Important Region	19	8977728	8977934	FullRegion	1	2
A	Important Region + Important Region	19	8979180	8979271	FullRegion	1	1
A	Important Region + Important Region	17	29562624	29563044	FullRegion	1	4
A	Important Region + Important Region	17	29645319	29646046	FullRegion	1	9
A	Important Region + Important Region	11	108186545	108186845	FullRegion	1	3
A	Important Region + Important Region	11	108236090	108236235	FullRegion	1	2
A	Important Region + Important Region	4	187518200	187518330	FullRegion	1	1
A	Important Region + Important Region	4	187521047	187521519	FullRegion	1	4
A	Important Region + Important Region	4	187524734	187525136	FullRegion	1	4
A	Important Region + Important Region	4	187527219	187527372	FullRegion	1	2
A	Important Region + Important Region	4	187530950	187531174	FullRegion	1	2
A	Important Region + Important Region	4	187532535	187532934	FullRegion	1	3
A	Important Region + Important Region	4	187534258	187534501	FullRegion	1	2
A	Important Region + Important Region	4	187538154	187538360	FullRegion	1	2
A	Important Region + Important Region	4	187557174	187557394	FullRegion	1	2
A	Important Region + Important Region	4	187557734	187558073	FullRegion	1	4
A	Important Region + Important Region	4	187584448	187584772	FullRegion	1	3
A	Important Region + Important Region	4	187630206	187630896	FullRegion	1	6
A	Important Region + Important Region + Important Region + Important Region	4	187518831	187519284	FullRegion	1	5
A	Important Region + Important Region + Important Region + Important Region	4	187549303	187549922	FullRegion	1	8
A	Important Region + Important Region + Important Region + Important Region + Important Region + Important Region + Important Region	4	187627712	187629885	FullRegion	1	24
A	Important Region + Important Region + Important Region + Important Region + Important Region + Important Region + Important Region + Important Region + Important Region + Important Region + Important Region + Important Region + Important Region + Important Region	4	187538857	187542934	FullRegion	1	44
A	KRAS	12	25358180	25403854	Cds	5	10
A	MDM2	12	69201971	69239320	Cds	9	18
A	MDM2 + MDM2	12	69218138	69218436	FullRegion	1	3
A	MET	7	116312459	116438440	Cds	13	38
A	MET + MET	7	116397486	116397833	FullRegion	1	3
A	MET + MET	7	116399386	116399549	FullRegion	1	2
A	MET + MET	7	116411547	116412048	FullRegion	1	5
A	MET + MET	7	116435704	116436180	FullRegion	1	4
A	MUC4	3	195473638	195538844	Cds	21	61
A	MUC4 + MUC4	3	195477755	195478147	FullRegion	1	4
A	MUC4 + MUC4	3	195491863	195492325	FullRegion	1	4
A	NRAS	1	115247085	115259515	Cds	4	6
A	PBRM1	3	52579368	52719866	Cds	27	56
A	PBRM1 + PBRM1	3	52584432	52584838	FullRegion	1	4
A	PIK3CA	3	178866311	178952497	Cds	16	36
A	PIK3CA + PIK3CA	3	178927969	178928358	FullRegion	1	4
A	PIK3CA + PIK3CA	3	178947787	178948169	FullRegion	1	4
A	PTEN	10	89623195	89728532	Cds	9	17
A	RNF43	17	56431038	56494931	Cds	7	23
A	RNF43 + RNF43	17	56440631	56440966	FullRegion	1	3
A	ROBO2	3	77089294	77699114	Cds	24	47
A	ROBO2 + ROBO2	3	77147158	77147496	FullRegion	1	3
A	SMAD4	18	48556583	48611411	Cds	9	18
A	SMAD4 + SMAD4	18	48584490	48584831	FullRegion	1	3
A	SMARCA4	19	11071598	11172958	Cds	27	45
A	SMARCA4 + SMARCA4	19	11106884	11107225	FullRegion	1	3
A	SMARCA4 + SMARCA4	19	11113700	11114078	FullRegion	1	3
A	SMARCA4 + SMARCA4	19	11151969	11152241	FullRegion	1	3
A	SMARCA4 + SMARCA4	19	11168926	11169044	FullRegion	1	2
A	SMARCA4 + SMARCA4	19	11170424	11170868	FullRegion	1	4
A	STK11	19	1205798	1228434	Cds	7	12
A	STK11 + STK11	19	1220367	1220721	FullRegion	1	3
A	TERT	5	1253287	1295162	Cds	14	22
A	TERT + TERT	5	1293423	1295109	FullRegion	1	16
A	TP53	17	7571720	7590868	Cds	3	3
A	TP53 + TP53 + TP53	17	7578172	7578559	FullRegion	1	4
A	TP53 + TP53 + TP53 + TP53	17	7576535	7577160	FullRegion	1	6
A	TP53 + TP53 + TP53 + TP53	17	7579307	7579917	FullRegion	1	5
B	ADAMTSL3	15	84322838	84708593	Cds	27	60
B	ADAMTSL3 + ADAMTSL3	15	84611343	84611839	FullRegion	1	4
B	ARID1A	1	27022522	27108601	Cds	12	50
B	ARID1A + ARID1A	1	27092707	27093062	FullRegion	1	3
B	ARID1A + ARID1A	1	27098986	27099483	FullRegion	1	4
B	ARID1A + ARID1A	1	27100815	27101716	FullRegion	1	10
B	ARID1A + ARID1A + ARID1A	1	27099832	27100394	FullRegion	1	5
B	ARID2	12	46123620	46301819	Cds	11	52
B	ARID2 + ARID2	12	46123615	46123925	FullRegion	1	3
B	ARID2 + ARID2	12	46230367	46230779	FullRegion	1	4
B	ARID2 + ARID2	12	46231099	46231495	FullRegion	1	4
B	ARID2 + ARID2	12	46285558	46285884	FullRegion	1	3
B	ARID2 + ARID2	12	46287198	46287509	FullRegion	1	4
B	AXIN1	16	337440	402676	Cds	10	29
B	BAP1	3	52435025	52444009	Cds	7	12
B	BAP1 + BAP1	3	52437149	52437915	FullRegion	1	9
B	BAP1 + BAP1	3	52441185	52441481	FullRegion	1	3
B	BAP1 + BAP1 + BAP1	3	52436302	52436892	FullRegion	1	5
B	BAP1 + BAP1 + BAP1	3	52443565	52443899	FullRegion	1	3
B	BRAF	7	140433813	140624564	Cds	18	33
B	BRCA1	17	41196312	41277500	Cds	19	25
B	BRCA1 + BRCA1	17	41197693	41197824	FullRegion	1	1
B	BRCA1 + BRCA1	17	41228500	41228636	FullRegion	1	2
B	BRCA1 + BRCA1	17	41243447	41246882	FullRegion	1	36
B	BRCA1 + BRCA1	17	41258468	41258555	FullRegion	1	1
B	CDH1	16	68771195	68869444	Cds	14	29
B	CDH1 + CDH1	16	68842322	68842756	FullRegion	1	4
B	CDKN2A	9	21967751	21994490	Cds	3	4
B	CDKN2A + CDKN2A	9	21970896	21971212	FullRegion	1	3
B	CDKN2A + CDKN2A	9	21974474	21974831	FullRegion	1	4
B	CTNNB1	3	41240942	41281939	Cds	7	12
B	CTNNB1 + CTNNB1	3	41274827	41275363	FullRegion	1	5
B	CTNNB1 + CTNNB1	3	41277835	41278205	FullRegion	1	4
B	CTNNB1 + CTNNB1 + CTNNB1	3	41266440	41267357	FullRegion	1	10
B	ELF3	1	201979690	201986315	Cds	3	5
B	ELF3 + ELF3	1	201981080	201981569	FullRegion	1	5
B	ELF3 + ELF3 + ELF3	1	201981763	201982431	FullRegion	1	8
B	EPHA2	1	16450832	16482582	Cds	10	21
B	EPHA2 + EPHA2	1	16459670	16460106	FullRegion	1	4
B	EPHA2 + EPHA2	1	16464343	16464930	FullRegion	1	7
B	EPHA2 + EPHA2 + EPHA2	1	16458211	16458939	FullRegion	1	8
B	ERBB2	17	37844393	37884915	Cds	11	17
B	ERBB2 + ERBB2	17	37863238	37863399	FullRegion	1	2
B	ERBB2 + ERBB2	17	37866334	37866739	FullRegion	1	4
B	ERBB2 + ERBB2	17	37871534	37871794	FullRegion	1	3
B	ERBB2 + ERBB2	17	37872549	37872863	FullRegion	1	3
B	ERBB2 + ERBB2	17	37879567	37879918	FullRegion	1	3
B	ERBB2 + ERBB2	17	37882810	37883261	FullRegion	1	4
B	ERBB2 + ERBB2	17	37883543	37884299	FullRegion	1	8
B	ERBB2 + ERBB2 + ERBB2	17	37880974	37881660	FullRegion	1	8
B	ERBB3	12	56473809	56497291	Cds	10	17
B	ERBB3 + ERBB3	12	56478774	56479098	FullRegion	1	3
B	ERBB3 + ERBB3	12	56482322	56482657	FullRegion	1	3
B	ERBB3 + ERBB3	12	56486526	56486865	FullRegion	1	3
B	ERBB3 + ERBB3	12	56492279	56492694	FullRegion	1	4
B	ERBB3 + ERBB3	12	56494840	56495841	FullRegion	1	11
B	ERBB3 + ERBB3 + ERBB3	12	56481356	56481951	FullRegion	1	5
B	ERBB3 + ERBB3 + ERBB3	12	56490282	56491019	FullRegion	1	8
B	ERBB3 + ERBB3 + ERBB3	12	56493427	56494034	FullRegion	1	5
B	FAM47A	X	34147869	34150447	Cds	1	17
B	FBXW7	4	153242410	153456393	Cds	12	28
B	FBXW7 + FBXW7	4	153332423	153332960	FullRegion	1	5
B	FGFR2	10	123237844	123357972	Cds	17	29
B	FGFR2 + FGFR2	10	123239093	123239540	FullRegion	1	4
B	FGFR2 + FGFR2	10	123274626	123274838	FullRegion	1	2
B	FGFR3	4	1795039	1810599	Cds	7	14
B	FGFR3 + FGFR3 + FGFR3	4	1803089	1803757	FullRegion	1	6
B	FGFR3 + FGFR3 + FGFR3	4	1808268	1808991	FullRegion	1	8
B	FGFR3 + FGFR3 + FGFR3 + FGFR3 + FGFR3	4	1807077	1808059	FullRegion	1	9
B	GNAS	20	57414795	57486250	Cds	7	12
B	GNAS + GNAS	20	57428316	57430393	FullRegion	1	19
B	GNAS + GNAS + GNAS	20	57478578	57478851	FullRegion	1	3
B	GNAS + GNAS + GNAS + GNAS + GNAS	20	57484212	57485141	FullRegion	1	10
B	IDH1	2	209100953	209119806	Cds	8	16
B	IDH2	15	90627212	90645708	Cds	4	6
B	IDH2 + IDH2	15	90630339	90630812	FullRegion	1	4
B	IDH2 + IDH2	15	90631586	90631984	FullRegion	1	4
B	IDH2 + IDH2 + IDH2	15	90628043	90628624	FullRegion	1	5
B	Important Region	17	29592260	29653216	Cds	5	34
B	Important Region	11	108205819	108235844	Cds	8	11
B	Important Region	4	187557976	187584615	Cds	1	1
B	Important Region	17	29560223	29586070	Cds	5	7
B	Important Region	11	108181002	108202674	Cds	12	21
B	Important Region	4	187549873	187557284	Cds	1	2
B	Important Region	4	187534351	187538164	Cds	1	2
B	Important Region	4	187527254	187531017	Cds	1	2
B	Important Region	4	187525045	187527253	Cds	1	2
B	Important Region	4	187521128	187522578	Cds	1	2
B	Important Region	5	112174169	112175302	Cds	1	12
B	Important Region	4	187524058	187524171	Cds	1	2
B	Important Region	5	112179678	112179724	FullRegion	1	1
B	Important Region	17	29654533	29654576	FullRegion	1	1
B	Important Region	11	108119673	108119710	FullRegion	1	2
B	Important Region	11	108178606	108178643	FullRegion	1	1
B	Important Region	19	8973410	8973445	FullRegion	1	1
B	Important Region	19	8958758	8958793	FullRegion	1	0
B	Important Region	19	8955016	8955051	FullRegion	1	1
B	Important Region	19	8955751	8955786	FullRegion	1	1
B	Important Region	19	8971875	8971910	FullRegion	1	1
B	Important Region	19	8953476	8953511	FullRegion	1	1
B	Important Region	19	8974589	8974624	FullRegion	1	1
B	Important Region	19	8969805	8969840	FullRegion	1	0
B	Important Region	19	8955343	8955378	FullRegion	1	1
B	Important Region	19	8980820	8980855	FullRegion	1	1
B	Important Region	19	8960033	8960068	FullRegion	1	1
B	Important Region	19	8966514	8966549	FullRegion	1	1
B	Important Region	19	8980245	8980280	FullRegion	1	0
B	Important Region	19	8966162	8966197	FullRegion	1	0
B	Important Region + Important Region	19	8977728	8977934	FullRegion	1	2
B	Important Region + Important Region	19	8979180	8979271	FullRegion	1	1
B	Important Region + Important Region	17	29562624	29563044	FullRegion	1	4
B	Important Region + Important Region	17	29645319	29646046	FullRegion	1	9
B	Important Region + Important Region	11	108186545	108186845	FullRegion	1	3
B	Important Region + Important Region	11	108236090	108236235	FullRegion	1	2
B	Important Region + Important Region	4	187518200	187518330	FullRegion	1	1
B	Important Region + Important Region	4	187521047	187521519	FullRegion	1	4
B	Important Region + Important Region	4	187524734	187525136	FullRegion	1	4
B	Important Region + Important Region	4	187527219	187527372	FullRegion	1	2
B	Important Region + Important Region	4	187530950	187531174	FullRegion	1	2
B	Important Region + Important Region	4	187532535	187532934	FullRegion	1	3
B	Important Region + Important Region	4	187534258	187534501	FullRegion	1	2
B	Important Region + Important Region	4	187538154	187538360	FullRegion	1	2
B	Important Region + Important Region	4	187557174	187557394	FullRegion	1	2
B	Important Region + Important Region	4	187557734	187558073	FullRegion	1	4
B	Important Region + Important Region	4	187584448	187584772	FullRegion	1	3
B	Important Region + Important Region	4	187630206	187630896	FullRegion	1	6
B	Important Region + Important Region + Important Region + Important Region	4	187518831	187519284	FullRegion	1	5
B	Important Region + Important Region + Important Region + Important Region	4	187549303	187549922	FullRegion	1	8
B	Important Region + Important Region + Important Region + Important Region + Important Region + Important Region + Important Region	4	187627712	187629885	FullRegion	1	24
B	Important Region + Important Region + Important Region + Important Region + Important Region + Important Region + Important Region + Important Region + Important Region + Important Region + Important Region + Important Region + Important Region + Important Region	4	187538857	187542934	FullRegion	1	44
B	KRAS	12	25358180	25403854	Cds	5	10
B	MDM2	12	69201971	69239320	Cds	9	18
B	MDM2 + MDM2	12	69218138	69218436	FullRegion	1	3
B	MET	7	116312459	116438440	Cds	13	38
B	MET + MET	7	116397486	116397833	FullRegion	1	3
B	MET + MET	7	116399386	116399549	FullRegion	1	2
B	MET + MET	7	116411547	116412048	FullRegion	1	5
B	MET + MET	7	116435704	116436180	FullRegion	1	4
B	MUC4	3	195473638	195538844	Cds	21	61
B	MUC4 + MUC4	3	195477755	195478147	FullRegion	1	4
B	MUC4 + MUC4	3	195491863	195492325	FullRegion	1	4
B	NRAS	1	115247085	115259515	Cds	4	6
B	PBRM1	3	52579368	52719866	Cds	27	56
B	PBRM1 + PBRM1	3	52584432	52584838	FullRegion	1	4
B	PIK3CA	3	178866311	178952497	Cds	16	36
B	PIK3CA + PIK3CA	3	178927969	178928358	FullRegion	1	4
B	PIK3CA + PIK3CA	3	178947787	178948169	FullRegion	1	4
B	PTEN	10	89623195	89728532	Cds	9	17
B	RNF43	17	56431038	56494931	Cds	7	23
B	RNF43 + RNF43	17	56440631	56440966	FullRegion	1	3
B	ROBO2	3	77089294	77699114	Cds	24	47
B	ROBO2 + ROBO2	3	77147158	77147496	FullRegion	1	3
B	SMAD4	18	48556583	48611411	Cds	9	18
B	SMAD4 + SMAD4	18	48584490	48584831	FullRegion	1	3
B	SMARCA4	19	11071598	11172958	Cds	27	45
B	SMARCA4 + SMARCA4	19	11106884	11107225	FullRegion	1	3
B	SMARCA4 + SMARCA4	19	11113700	11114078	FullRegion	1	3
B	SMARCA4 + SMARCA4	19	11151969	11152241	FullRegion	1	3
B	SMARCA4 + SMARCA4	19	11168926	11169044	FullRegion	1	2
B	SMARCA4 + SMARCA4	19	11170424	11170868	FullRegion	1	4
B	STK11	19	1205798	1228434	Cds	7	12
B	STK11 + STK11	19	1220367	1220721	FullRegion	1	3
B	TERT	5	1253287	1295162	Cds	14	22
B	TERT + TERT	5	1293423	1295109	FullRegion	1	16
B	TP53	17	7571720	7590868	Cds	3	3
B	TP53 + TP53 + TP53	17	7578172	7578559	FullRegion	1	4
B	TP53 + TP53 + TP53 + TP53	17	7576535	7577160	FullRegion	1	6
B	TP53 + TP53 + TP53 + TP53	17	7579307	7579917	FullRegion	1	5

## Sheet: SupplTable3
Supplementary Table 2: Primer Sequences
Patient	Sample	Gene	Variant	Chromosome	Coordinate	Sangersequencing=1, Pyro Seq=2	F-Primer	R-Primer	S-Primer	Biotinylated Primer (F=forward, R=reverse)	Comment
38	b	PBRM1	A>A/AT	3	52643942	1	TCTCCAGGATACCAGAGGTGA	AGACTCCGGCTCATTGTACG
38	t	PBRM1	A>A/AT	3	52643942	1	TCTCCAGGATACCAGAGGTGA	AGACTCCGGCTCATTGTACG
67	t	PBRM1	CTA>CTA/C	3	52682416	2	ATGTGGGGTTCTTTTTTTAAAGGT	GGCATTTTTTGCGAGGAGA	ATGCAATGGCCAAAG	R
87	t	PIK3CA	A>A/G	3	178916944	2	AACCAGTAGGCAACCGTGAAG	TCATACCAATTTCTCGATTGAGG	GGCAACCGTGAAGAA	R
87	b	PIK3CA	A>A/G	3	178916944	2	AACCAGTAGGCAACCGTGAAG	TCATACCAATTTCTCGATTGAGG	GGCAACCGTGAAGAA	R
73	b	SMAD4	C>C/T	18	48575080	2	GGCTGGTCGGAAAGGATTT	AGATCAGGCCACCTCCAGAG	CGGGCATAGATCACA	F
43	b1	SMAD4	A>A/G	18	48575135	2	GGCTGGTCGGAAAGGATTT	CCAATTCCAGGTGATACAACTCG	GATCTTCACAAAAATGAACT	R
73	b	SMAD4	T>T/G	18	48591853	2	GTGTTGTGGAGTGCAAGTGAAA	TCAACAGTAACAATAGGGCAGCTT	TGTTCAGGTAGGAGAGACA	R
73	t	SMAD4	ACCCGC>ACCCGC/A	18	48584794	2	ATTTGCCTCACCACCAAAACG	TACAGTAATGTCCGGGATGGGG	GGATGGGGCGGCATA	F	PCR for 73b could not be performed since no more sample was available
42	b2	SMAD4	TACTTCATAC>TACTTCATAC/T	18	48604794		GGTGTTGATGACCTTCGTCG	CCCCAACGGTAAAAGACCTCA
42	t	SMAD4	TACTTCATAC>TACTTCATAC/T	18	48604794		GGTGTTGATGACCTTCGTCG	CCCCAACGGTAAAAGACCTCA
43	b1	SMAD4	T>T/TA	18	48575132	1	GGCTGGTCGGAAAGGATTT	CCAATTCCAGGTGATACAACTCG	CTGATCTTCACAAAAATGA	R

## Sheet: SupplTable4
Supplementary Table 3: Sequencing data of all samples
ID	Sample	Total Aligned reads (R1)	Total Aligned reads (R2)	Percent Aligned reads (R1/R2)	Overall aligned reads	Total aligned bases (R1/R2)	overall aligned bases (R1/R2)	Percent aligned bases (R1/R2)	overall percent aligned bases	Percent Q30 (R1/R2)	Mismatch rate (R1/R2)	Amplicon Mean Coverage Depth	Uniformity of Coverage (Pct > 0,2*mean)
1	b	11078057	10860016	85.6% / 84.0%	84.8%	1328582827 / 1302111511	2630694338	68.5% / 67.1%	67.8%	93.0% / 90.3%	0.32% / 0.34%	6907.5	0.925
1	n	5859349	5697550	53.7% / 52.2%	52.9%	700049269 / 680607928	1380657197	42.8% / 41.6%	42.2%	90.1% / 89.1%	0.36% / 0.40%	3638.8	0.908
1	t	12581232	12263248	88.1% / 85.9%	87.0%	1506655055 / 1468319246	2974974301	70.4% / 68.6%	69.5%	92.5% / 89.1%	0.38% / 0.41%	7822.6	0.916
6	n	8172318	7975908	87.5% / 85.4%	86.4%	982598382 / 959347510	1941945892	70.1% / 68.5%	69.3%	92.4% / 89.6%	0.24% / 0.27%	5084.5	0.926
6	b	14320746	14018946	91.6% / 89.7%	90.7%	1721389644 / 1684600863	3405990507	73.4% / 71.8%	72.6%	92.4% / 89.4%	0.27% / 0.31%	8923.1	0.935
6	t	15822096	15446634	92.0% / 89.9%	91.0%	1904330424 / 1858916810	3763247234	73.9% / 72.1%	73.0%	92.3% / 89.0%	0.29% / 0.33%	9845.3	0.935
8	b	9684744	9508739	90.8% / 89.2%	90.0%	1159600826 / 1138210771	2297811597	72.5% / 71.1%	71.8%	93.3% / 90.5%	0.30% / 0.32%	6043.3	0.912
8	t	11635290	11377216	83.7% / 81.9%	82.8%	1394905422 / 1363761630	2758667052	66.9% / 65.4%	66.2%	92.3% / 89.3%	0.32% / 0.35%	7245.8	0.938
8	n	6841975	6657422	90.4% / 87.9%	89.1%	819601155 / 797282874	1616884029	72.2% / 70.2%	71.2%	92.8% / 89.5%	0.32% / 0.35%	4250.4	0.918
36	b	8743769	8580612	89.3% / 87.7%	88.5%	1051645644 / 1031754177	2083399821	71.6% / 70.3%	71.0%	92.8% / 90.1%	0.28% / 0.31%	5454.8	0.94
36	t	13718694	13420902	90.3% / 88.3%	89.3%	1652404325 / 1616234322	3268638647	72.5% / 70.9%	71.7%	92.2% / 89.0%	0.27% / 0.31%	8545.2	0.941
36	n	10756493	10542767	87.0% / 85.2%	86.1%	1293855450 / 1268022884	2561878334	69.7% / 68.3%	69.0%	92.2% / 89.3%	0.24% / 0.28%	6706.3	0.942
38	n	12388688	12128054	93.5% / 91.5%	92.5%	1489788746 / 1458218315	2948007061	74.9% / 73.4%	74.1%	92.7% / 89.5%	0.25% / 0.29%	7719.4	0.938
38	b	18744450	18319165	89.3% / 87.3%	88.3%	2257551686 / 2206178015	4463729701	71.7% / 70.1%	70.9%	92.2% / 89.2%	0.28% / 0.32%	11669.9	0.939
38	t	9921850	9708086	89.1% / 87.1%	88.1%	1198297746 / 1172263772	2370561518	71.7% / 70.1%	70.9%	92.0% / 88.9%	0.27% / 0.31%	6180.7	0.937
42	b2	8666066	8472008	82.2% / 80.4%	81.3%	1038042883 / 1014604573	2052647456	65.7% / 64.2%	64.9%	93.0% / 89.9%	0.29% / 0.32%	5396.1	0.9
42	b1	9461970	9322780	86.1% / 84.9%	85.5%	1137429153 / 1120548525	2257977678	69.0% / 68.0%	68.5%	92.9% / 90.5%	0.28% / 0.30%	5914.6	0.941
42	n	11503708	11269436	92.2% / 90.3%	91.2%	1386549998 / 1358215082	2744765080	74.1% / 72.5%	73.3%	92.4% / 89.5%	0.24% / 0.28%	7170.4	0.946
42	t	12193194	11932304	91.8% / 89.9%	90.9%	1468995567 / 1437357354	2906352921	73.8% / 72.2%	73.0%	92.3% / 89.1%	0.27% / 0.30%	7596.2	0.944
43	t	14276034	14034845	69.1% / 67.9%	68.5%	1718904558 / 1689451837	3408356395	55.4% / 54.5%	55.0%	92.2% / 89.7%	0.28% / 0.31%	8914	0.937
43	b1	9763750	9586521	88.2% / 86.6%	87.4%	1172005460 / 1150381552	2322387012	70.6% / 69.3%	69.9%	93.1% / 90.5%	0.27% / 0.30%	6092.7	0.925
43	b2	9732242	9583246	87.0% / 85.7%	86.3%	1168604233 / 1150420664	2319024897	69.6% / 68.5%	69.1%	93.1% / 90.6%	0.27% / 0.29%	6081.7	0.931
43	n	13578641	13329244	93.1% / 91.4%	92.2%	1631837329 / 1601592749	3233430078	74.6% / 73.2%	73.9%	92.7% / 89.6%	0.24% / 0.27%	8472.3	0.942
43	d	14506635	14188430	84.8% / 82.9%	83.9%	1746008982 / 1707779123	3453788105	68.0% / 66.5%	67.3%	91.9% / 89.0%	0.30% / 0.33%	9035	0.937
51	b	9527953	9313072	86.0% / 84.0%	85.0%	1140704497 / 1114810242	2255514739	68.6% / 67.1%	67.9%	93.3% / 89.9%	0.30% / 0.32%	5932.3	0.898
51	t	6973526	6849576	67.5% / 66.3%	66.9%	837111956 / 822157773	1659269729	54.0% / 53.1%	53.5%	92.3% / 89.7%	0.32% / 0.35%	4352.4	0.937
51	n	6733816	6563079	82.0% / 79.9%	81.0%	805142310 / 784424662	1589566972	65.4% / 63.7%	64.5%	92.5% / 89.8%	0.34% / 0.37%	4186.7	0.906
59	b	8931724	8759162	79.6% / 78.0%	78.8%	1068450334 / 1047658861	2116109195	63.5% / 62.2%	62.9%	93.0% / 90.2%	0.28% / 0.31%	5570.2	0.897
59	n	13841307	13577058	93.0% / 91.2%	92.1%	1664755497 / 1632804574	3297560071	74.6% / 73.2%	73.9%	92.5% / 89.5%	0.26% / 0.30%	8633	0.946
59	t	13660894	13388728	91.9% / 90.0%	91.0%	1646555535 / 1613497704	3260053239	73.8% / 72.3%	73.1%	92.2% / 89.2%	0.28% / 0.32%	8516.9	0.946
67	b	8534726	8387906	90.7% / 89.1%	89.9%	1023876597 / 1006052860	2029929457	72.5% / 71.3%	71.9%	93.1% / 90.5%	0.28% / 0.31%	5328.3	0.928
67	n	13383569	13088062	92.9% / 90.8%	91.9%	1607545204 / 1571867881	3179413085	74.4% / 72.7%	73.6%	92.8% / 89.6%	0.27% / 0.31%	8334.9	0.936
67	t	11219336	10990108	91.7% / 89.8%	90.8%	1350090992 / 1322056727	2672147719	73.6% / 72.1%	72.8%	92.4% / 89.4%	0.29% / 0.33%	6992.9	0.848
73	b	9939056	9780623	88.5% / 87.1%	87.8%	1194952049 / 1175749943	2370701992	71.0% / 69.8%	70.4%	92.9% / 90.4%	0.28% / 0.30%	6209	0.935
73	t	10015743	9843892	85.7% / 84.3%	85.0%	1206630943 / 1185692193	2392323136	68.8% / 67.7%	68.3%	92.5% / 90.0%	0.25% / 0.27%	6253	0.932
73	n	13318938	13093884	90.4% / 88.9%	89.7%	1603711726 / 1576529542	3180241268	72.6% / 71.4%	72.0%	92.3% / 89.5%	0.25% / 0.28%	8316.4	0.945
86	b2	11738669	11465109	69.9% / 68.3%	69.1%	1403216490 / 1370228528	2773445018	55.7% / 54.4%	55.0%	92.9% / 89.8%	0.33% / 0.36%	7306	0.866
86	b4	8986371	8803551	90.0% / 88.2%	89.1%	1080453278 / 1058235340	2138688618	72.2% / 70.7%	71.4%	92.9% / 89.6%	0.33% / 0.36%	5601.4	0.943
86	b1	16418609	15946500	68.9% / 66.9%	67.9%	1961715156 / 1904207061	3865922217	54.9% / 53.3%	54.1%	92.8% / 89.5%	0.33% / 0.36%	10190.5	0.793
86	t	9140998	8986478	81.5% / 80.1%	80.8%	1097842818 / 1079117941	2176960759	65.3% / 64.1%	64.7%	92.8% / 90.3%	0.33% / 0.35%	5707.6	0.936
86	b3	9518728	9330715	91.7% / 89.9%	90.8%	1142049134 / 1119445838	2261494972	73.4% / 71.9%	72.6%	93.1% / 90.0%	0.35% / 0.37%	5935	0.93
86	n	14247839	13951176	88.0% / 86.2%	87.1%	1707784021 / 1671834285	3379618306	70.3% / 68.8%	69.6%	92.8% / 89.7%	0.30% / 0.34%	8878.8	0.922
87	b	10796664	10595984	91.4% / 89.7%	90.6%	1295973988 / 1271686259	2567660247	73.2% / 71.8%	72.5%	93.2% / 89.9%	0.32% / 0.35%	6735.7	0.936
87	t	12280100	12008733	83.1% / 81.3%	82.2%	1475198373 / 1442443545	2917641918	66.6% / 65.1%	65.8%	92.0% / 89.0%	0.35% / 0.39%	7647.6	0.939
87	n	7358701	7164598	87.9% / 85.6%	86.7%	881269410 / 857792731	1739062141	70.2% / 68.3%	69.2%	92.6% / 89.5%	0.35% / 0.39%	4572.8	0.918
139	n	5258954	5123420	67.8% / 66.0%	66.9%	630558111 / 614320484	1244878595	54.2% / 52.8%	53.5%	91.0% / 89.1%	0.44% / 0.47%	3269	0.933
139	t	8793144	8653562	79.0% / 77.7%	78.4%	1054665152 / 1037830577	2092495729	63.2% / 62.2%	62.7%	92.5% / 90.1%	0.42% / 0.44%	5493.3	0.935
139	b	8291047	8131586	84.5% / 82.9%	83.7%	993112511 / 973842223	1966954734	67.5% / 66.2%	66.9%	93.0% / 90.2%	0.32% / 0.34%	5170.9	0.918
140	t	8175798	8032315	77.8% / 76.5%	77.1%	979291684 / 961855338	1941147022	62.1% / 61.0%	61.6%	92.6% / 90.2%	0.41% / 0.43%	5103.3	0.933
140	b	10220932	10067447	80.3% / 79.1%	79.7%	1223929311 / 1205425346	2429354657	64.1% / 63.1%	63.6%	93.1% / 90.6%	0.33% / 0.36%	6388	0.929
140	n	9750283	9490902	88.1% / 85.7%	86.9%	1166239589 / 1134946801	2301186390	70.2% / 68.3%	69.3%	92.7% / 89.7%	0.35% / 0.38%	6058.3	0.915
141	b	6641713	6509695	85.4% / 83.7%	84.5%	793122676 / 777239624	1570362300	68.0% / 66.6%	67.3%	93.1% / 89.9%	0.33% / 0.36%	4140.9	0.887
141	d	9059555	8881575	84.6% / 82.9%	83.7%	1087973832 / 1066483157	2154456989	67.7% / 66.4%	67.0%	92.7% / 89.8%	0.37% / 0.39%	5649	0.938
141	t	8954913	8807868	84.2% / 82.9%	83.6%	1075961697 / 1058092611	2134054308	67.5% / 66.4%	66.9%	92.5% / 90.1%	0.34% / 0.36%	5592.8	0.936
141	n	7087939	6917250	47.6% / 46.5%	47.0%	846113422 / 825908744	1672022166	37.9% / 37.0%	37.4%	89.5% / 88.9%	0.35% / 0.38%	4409.7	0.896

## Sheet: SupplTable5
Supplementary Table 4: All identified mutations
Patient	Sample	Gene	Variant	Chr	Coordinate	Type	Transcript	Consequence	HGVSp
1	b	NF1	C>C/T	17	29585383	snv	NM_001042492.2	stop_gained	NP_001035957.1:p.Gln1399Ter
1	t	NF1	C>C/T	17	29585383	snv	NM_001042492.2	stop_gained	NP_001035957.1:p.Gln1399Ter
1	b	RNF43	C>C/CTTGA	17	56448323	insertion	NM_017763.4	frameshift_variant, feature_elongation	NP_060233.3:p.Lys108AsnfsTer18
1	t	RNF43	C>C/CTTGA	17	56448323	insertion	NM_017763.4	frameshift_variant, feature_elongation	NP_060233.3:p.Lys108AsnfsTer18
1	t	SMAD4	A>A/C	18	48604788	snv	NM_005359.5	missense_variant	NP_005350.1:p.Asp537Ala
1	b	SMAD4	A>A/C	18	48604788	snv	NM_005359.5	missense_variant	NP_005350.1:p.Asp537Ala
36	b	TP53	G>G/A	17	7578263	snv	NM_000546.5	stop_gained	NP_000537.3:p.Arg196Ter
36	t	TP53	G>G/A	17	7578263	snv	NM_000546.5	stop_gained	NP_000537.3:p.Arg196Ter
38	b	BAP1	GC>GC/TA	3	52441254	mnp	NM_004656.2	missense_variant	NP_004647.1:p.Ser172Ile
38	t	BAP1	GC>GC/TA	3	52441254	mnp	NM_004656.2	missense_variant	NP_004647.1:p.Ser172Ile
38	b	PBRM1	A>A/AT	3	52643942	insertion	NM_018313.4	frameshift_variant, feature_elongation	NP_060783.3:p.Ser652IlefsTer13
38	t	PBRM1	A>A/AT	3	52643942	insertion	NM_018313.4	frameshift_variant, feature_elongation	NP_060783.3:p.Ser652IlefsTer13
42	b2	ARID1A	C>C/T	1	27099098	snv	NM_006015.4	stop_gained	NP_006006.3:p.Gln1172Ter
42	t	ARID1A	C>C/T	1	27099098	snv	NM_006015.4	stop_gained	NP_006006.3:p.Gln1172Ter
42	b2	SMAD4	C>C/T	18	48593466	snv	NM_005359.5	missense_variant	NP_005350.1:p.Ala406Val
42	t	SMAD4	C>C/T	18	48593466	snv	NM_005359.5	missense_variant	NP_005350.1:p.Ala406Val
42	b2	SMAD4	TACTTCATAC>TACTTCATAC/T	18	48604794	deletion	NM_005359.5	missense_variant, feature_truncation	NP_005350.1:p.Leu540_Thr542del
42	t	SMAD4	TACTTCATAC>TACTTCATAC/T	18	48604794	deletion	NM_005359.5	missense_variant, feature_truncation	NP_005350.1:p.Leu540_Thr542del
43	b1	ELF3	G>G/GA	1	201984428	insertion	NM_001114309.1	frameshift_variant, feature_elongation	NP_001107781.1:p.Val366GlyfsTer105
43	b1	SMAD4	A>A/G	18	48575135	snv	NM_005359.5	missense_variant	NP_005350.1:p.Lys110Arg
43	b1	SMAD4	T>T/TA	18	48575132	insertion	NM_005359.5	frameshift_variant, feature_elongation	NP_005350.1:p.His111ThrfsTer3
51	b	ERBB3	C>C/T	12	56482607	snv	NM_001982.3	missense_variant	NP_001973.2:p.Thr355Ile
51	t	ERBB3	C>C/T	12	56482607	snv	NM_001982.3	missense_variant	NP_001973.2:p.Thr355Ile
51	b	GNAS	G>G/A	20	57474036	snv	NM_080425.2	missense_variant	NP_536350.2:p.Asp728Asn
59	b	ARID2	G>G/T	12	46243362	snv	NM_152641.2	splice_acceptor_variant
59	t	ARID2	G>G/T	12	46243362	snv	NM_152641.2	splice_acceptor_variant
59	b	EPHA2	C>C/T	1	16461663	snv	NM_004431.3	missense_variant	NP_004422.2:p.Val484Met
67	t	BAP1	C>C/A	3	52441328	snv	NM_004656.2	stop_gained	NP_004647.1:p.Glu148Ter
67	t	PBRM1	CTA>CTA/C	3	52682416	deletion	NM_018313.4	frameshift_variant, feature_truncation	NP_060783.3:p.Ile252ArgfsTer11
73	b	FAM47A	C>C/T	X	34149570	snv	NM_203408.3	missense_variant	NP_981953.2:p.Ala276Thr
73	t	FAM47A	C>C/T	X	34149570	snv	NM_203408.3	missense_variant	NP_981953.2:p.Ala276Thr
73	b	MUC4	A>A/C	3	195517128	snv	NM_018406.6	missense_variant	NP_060876.5:p.Ser441Arg
73	b	SMAD4	C>C/T	18	48575080	snv	NM_005359.5	missense_variant	NP_005350.1:p.His92Tyr
73	b	SMAD4	T>T/G	18	48591853	snv	NM_005359.5	missense_variant	NP_005350.1:p.Phe339Cys
73	b	SMAD4	ACCCGC>ACCCGC/A	18	48584794	deletion	NM_005359.5	frameshift_variant, feature_truncation
73	t	SMAD4	ACCCGC>ACCCGC/A	18	48584794	deletion	NM_005359.5	frameshift_variant, feature_truncation	NP_005350.1:p.Pro292TyrfsTer14
73	b	TP53	C>C/A	17	7578457	snv	NM_000546.5	missense_variant	NP_000537.3:p.Arg158Leu
73	t	TP53	C>C/A	17	7578457	snv	NM_000546.5	missense_variant	NP_000537.3:p.Arg158Leu
86	b3	ARID1A	G>G/A	1	27106648	snv	NM_006015.4	missense_variant	NP_006006.3:p.Gly2087Arg
86	b4	ARID1A	G>G/A	1	27106648	snv	NM_006015.4	missense_variant	NP_006006.3:p.Gly2087Arg
86	b2	ARID2	C>C/T	12	46244563	snv	NM_152641.2	missense_variant	NP_689854.2:p.Pro886Leu
86	b2	FAT1	G>G/A	4	187539555	snv	NM_005245.3	missense_variant	NP_005236.2:p.His2729Tyr
86	b2	GNAS	G>G/A	20	57484415	snv	NM_080425.2	missense_variant	NP_536350.2:p.Arg842His
86	t	PIK3CA	T>T/C	3	178919231	snv	NM_006218.2	missense_variant	NP_006209.2:p.Leu239Pro
86	b1	PIK3CA	T>T/C	3	178919231	snv	NM_006218.2	missense_variant	NP_006209.2:p.Leu239Pro
86	b2	PIK3CA	T>T/C	3	178919231	snv	NM_006218.2	missense_variant	NP_006209.2:p.Leu239Pro
86	b3	PIK3CA	T>T/C	3	178919231	snv	NM_006218.2	missense_variant	NP_006209.2:p.Leu239Pro
86	b4	PIK3CA	T>T/C	3	178919231	snv	NM_006218.2	missense_variant	NP_006209.2:p.Leu239Pro
86	t	RNF43	TG>TG/T	17	56435963	deletion	NM_017763.4	frameshift_variant, feature_truncation	NP_060233.3:p.Arg392GlufsTer27
86	b3	RNF43	TG>TG/T	17	56435963	deletion	NM_017763.4	frameshift_variant, feature_truncation	NP_060233.3:p.Arg392GlufsTer27
86	b4	RNF43	TG>TG/T	17	56435963	deletion	NM_017763.4	frameshift_variant, feature_truncation	NP_060233.3:p.Arg392GlufsTer27
86	t	SMARCA4	GC>GC/G	19	11097624	deletion	NM_001128849.1	frameshift_variant, feature_truncation	NP_001122321.1:p.Met272CysfsTer31
86	t	SMARCA4	C>C/T	19	11144146	snv	NM_001128849.1	missense_variant	NP_001122321.1:p.Arg1243Trp
86	b4	SMARCA4	C>C/T	19	11144146	snv	NM_001128849.1	missense_variant	NP_001122321.1:p.Arg1243Trp
86	b3	SMARCA4	C>C/T	19	11144146	snv	NM_001128849.1	missense_variant	NP_001122321.1:p.Arg1243Trp
86	b1	TP53	G>G/A	17	7578263	snv	NM_000546.5	stop_gained	NP_000537.3:p.Arg196Ter
86	b3	TP53	CG>CG/C	17	7579470	deletion	NM_000546.5	frameshift_variant, feature_truncation	NP_000537.3:p.Val73TrpfsTer50
86	b4	TP53	CG>CG/C	17	7579470	deletion	NM_000546.5	frameshift_variant, feature_truncation	NP_000537.3:p.Val73TrpfsTer50
86	b2	TP53	CG>CG/C	17	7579470	deletion	NM_000546.5	frameshift_variant, feature_truncation	NP_000537.3:p.Val73TrpfsTer50
86	b1	TP53	CG>CG/C	17	7579470	deletion	NM_000546.5	frameshift_variant, feature_truncation	NP_000537.3:p.Val73TrpfsTer50
87	t	MET	G>G/T	7	116339201	snv	NM_001127500.1	missense_variant	NP_001120972.1:p.Arg21Ser
87	b	MET	G>G/T	7	116339201	snv	NM_001127500.1	missense_variant	NP_001120972.1:p.Arg21Ser
87	t	PIK3CA	A>A/G	3	178916944	snv	NM_006218.2	missense_variant	NP_006209.2:p.Lys111Glu
87	b	PIK3CA	A>A/G	3	178916944	snv	NM_006218.2	missense_variant	NP_006209.2:p.Lys111Glu
87	t	TP53	C>C/A	17	7574027	snv	NM_000546.5	missense_variant	NP_000537.3:p.Gly334Trp
87	b	TP53	C>C/A	17	7574027	snv	NM_000546.5	missense_variant	NP_000537.3:p.Gly334Trp
139	t	NF1	C>C/T	17	29652851	snv	NM_001042492.2	stop_gained	NP_001035957.1:p.Gln1617Ter
139	b	NF1	C>C/T	17	29652851	snv	NM_001042492.2	stop_gained	NP_001035957.1:p.Gln1617Ter
139	t	TP53	T>T/C	17	7578235	snv	NM_000546.5	missense_variant	NP_000537.3:p.Tyr205Cys
139	b	TP53	T>T/C	17	7578235	snv	NM_000546.5	missense_variant	NP_000537.3:p.Tyr205Cys
140	b	EPHA2	T>T/C	1	16475274	snv	NM_004431.3	missense_variant	NP_004422.2:p.Lys141Arg
140	b	FGFR3	C>C/T	4	1801248	snv	NM_001163213.1	missense_variant	NP_001156685.1:p.Thr126Ile
140	t	FGFR3	C>C/T	4	1801248	snv	NM_001163213.1	missense_variant	NP_001156685.1:p.Thr126Ile
140	b	PTEN	G>G/T	10	89692901	snv	NM_000314.4	stop_gained	NP_000305.3:p.Gly129Ter
141	b	ERBB3	C>C/T	12	56481856	snv	NM_001982.3	missense_variant	NP_001973.2:p.Pro262Ser
141	t	ERBB3	T>T/G	12	56491666	snv	NM_001982.3	missense_variant	NP_001973.2:p.Phe853Cys
141	b	ERBB3	T>T/G	12	56491666	snv	NM_001982.3	missense_variant	NP_001973.2:p.Phe853Cys
141	d	ERBB3	T>T/G	12	56491666	snv	NM_001982.3	missense_variant	NP_001973.2:p.Phe853Cys
141	b	MET	G>G/A	7	116339760	snv	NM_001127500.1	missense_variant	NP_001120972.1:p.Asp208Asn
