# Supplementary material for: Sequencing of intraductal biopsies is feasible and potentially impacts clinical management of patients with indeterminate biliary stricture and cholangiocarcinoma
Source: Springer Nature journal article supplement (doi:10.1038/s41424-018-0015-6), 2018-04-01
Supplement: MOESM2 [file 41424_2018_15_MOESM2_ESM.docx]

Sequencing of intraductal biopsies improves diagnostic yield in indeterminate biliary stricture and reveals genetic heterogeneity

## Supplementary Information – methods

## Enrichment and sequencing

To reduce the detection of artifacts due to formalin-fixation and enhance the correct identification of low-frequency variants, a dual strand extension-ligation approach using two oligo probe set pools was applied. This design allows to enrich target sites at both DNA-strands which was reported to detect variants to an allele frequency of 5%23. After panel design, a wet-bench optimization was performed to reduce risk of low specificity of the newly designed panel and low performing amplicons were adapted. Sequencing libraries were prepared with the TruSeq Custom Amplicon Low Input Panel (Illumina, San Diego, CA) according to the manufacturer’s instructions. During enrichment process, fragment lengths of the libraries were controlled multiple times with a microfluidics-based platform (2100 Bioanalyzer, Agilent, Santa Clara, CA*)*. Sequencing was performed on an Illumina NextSeq500 (150 bp paired-end runs) with two High Output cartridges v2 (300 cycles). Samples were loaded on the cartridge that at least four gigabases per sample were sequenced.

## Variant Calling

Alignment, initial variant calling and annotation was performed with Variant DS v1.2 (Illumina) using the banded Smith-Waterman algorithm. The workflow was particularly designed for dual-strand targeted sequencing assays. Thereby, raw sequencing data were processed to FASTQ files with Isis (2.5.40.16, Illumina). Alignment and variant calling was performed with SAMtools (0.1.19-isis-1.0.3). Variant call formats (VCF) were generated with the Somatic Variant Caller (3.5.2.1) and annotation was performed with IAS (Illumina Annotation Service, v3). Thereby, variants were first called separately for each probe set and only variants present in both probe sets with a cumulative depth of 1000x or average depth of 500x per probe set were called as potential variants. After this initial filtering process, additional filter criteria were applied by using Variant Studio (2.2, Illumina): Variants were compared to the 1000 genomes project data base and common polymorphisms (allele frequency ≥0.01) as well as known dbSNP variants were excluded. Only non-synonymous variants in exons or splice sites of the targeted genes were further analyzed. All variants present in the control sample were subtracted from the matching resected tumor specimen or the respective biopsy. To reduce risk of false positive variant calling, only variants with a variant allele frequency of ≥5% (mean of both probe sets) were considered as true. All filtered variants were manually reviewed in both probe sets of all samples of the respective patient using the Integrative Genomics Viewer (v2.3, Broad Institute, Cambridge, MA) and all mutations with suspicion for sequencing or alignment error were removed. In case a variant was considered as true, all corresponding tumor and dysplasia samples were investigated in both probe sets for its presence and following criteria for its assessment were applied: Variants with an allele frequency ≥3% in both probe sets or ≥10% in a single probe set of the matching sample were considered true as well.

Sanger and pyrosequencing

Randomly selected representative (according to mutation type and allele frequency) single nucleotide variants (SNVs) were chosen for validation. For Sanger sequencing, primers were designed using NCBI Primer-Blast (http://www.ncbi.nlm.nih.gov/tools/primer-blast). PCR reaction was performed with *Taq* PCR Master Mix Kit (Qiagen, Hilden, Germany) according to manufacturer’s recommendations using 20 pmol primer and 25-50 ng template DNA. PCR reaction conditions were initial denaturation at 95°C for 300 s, 44 cycles of 95°C for 45 s, 56-61°C for 60 s and 72°C for 45 s, followed by 5 min ﬁnal extension at 72°C. The annealing temperature was chosen suitable for the respective primer pairs. PCR products premixed with 10 pmol primers were sent to Eurofins Genomics GmbH (Ebersberg, Germany) for sequencing.

For variants with very low allele frequency (<10%) or in case of poor primer design for Sanger sequencing, pyrosequencing was applied for validation. For this purpose, primer design was performed with PSQ Assay design (Biotage, Uppsala, Sweden) and assays were designed with Pyromark Q24 (Qiagen, Hilden, Germany). PCR reaction was performed with the PyroMark PCR Kit (Qiagen, Hilden, Germany) according to manufacturer’s recommendations using 20pmol primer and 25-50 ng template DNA. The PCRs were performed as described for Sanger sequencing. The resulting PCR products were sequenced with the PyroMark Q24 pyrosequencer using PyroMark Gold Q96 reagents (Qiagen, Hilden, Germany). All assays were run with tumor, dysplasia and non-tumor samples as well as positive (Qiagen human control DNA) and negative control. Primer sequences are listed in Supplementary Table 2.
